# Supplementary material for: Glucose-mediated proliferation of a gut commensal bacterium promotes Plasmodium infection by increasing mosquito midgut pH
Source: PubMed Central journal article supplement — Cell Rep. Author manuscript; Available in PMC 2021 May 13. (PMC8116483; doi:10.1016/j.celrep.2021.108992), 2021-04-20
Supplement: NIHMS1696724-supplement-1.pdf [file NIHMS1696724-supplement-1.pdf]

Cell Reports, Volume 35

## Supplemental information

### **Glucose-mediated proliferation of a gut commensal bacterium promotes *Plasmodium* infection by increasing mosquito midgut pH**

**Mengfei Wang, Yanpeng An, Li Gao, Shengzhang Dong, Xiaofeng Zhou, Yuebiao Feng, Penghua Wang, George Dimopoulos, Huiru Tang, and Jingwen Wang**

Cell Reports, Volume 35

## Supplemental information

### **Glucose-mediated proliferation of a gut commensal bacterium promotes *Plasmodium* infection by increasing mosquito midgut pH**

**Mengfei Wang, Yanpeng An, Li Gao, Shengzhang Dong, Xiaofeng Zhou, Yuebiao Feng, Penghua Wang, George Dimopoulos, Huiru Tang, and Jingwen Wang**

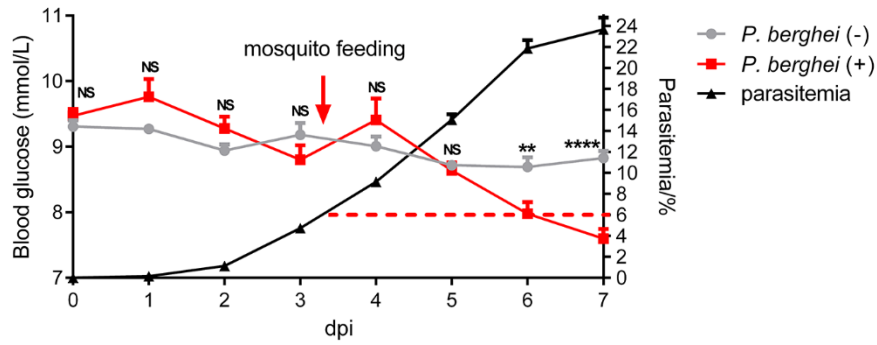

**Figure S1. Daily blood glucose level and parasitemia in *P. berghei* infected mice, Related to**

**Figure 1.**

Blood glucose levels (left y axis) of Balb/c mice infected with *P. berghei* (red line) or without *P. berghei* (grey line), and the parasitemia (right y axis, black line) from 0 to 7 days post infection. Data were shown as mean  $\pm$  SEM ( $n = 10$ ). Significance was determined by Student's *t* test. NS, not significant, \*\*,  $p < 0.01$ , and \*\*\*\*,  $p < 0.0001$

8 **Supplementary Table 1: Significantly changed metabolites with corresponding correlation**  
9 **coefficients in the mosquito extract between NB and IB Group. Related to Figure 1.** Lipids: R-  
10 *CH<sub>3</sub>*, R-*CH<sub>2</sub>*, *CH<sub>2</sub>CH<sub>2</sub>CO*, *CH<sub>2</sub>C=C*, UFA: unsaturated fatty acids; PC: phosphorylcholine; GPC:  
11 glycerophosphocholine; DMA: dimethylamine; ADP: adenosine diphosphate; IMP: Inosine 5'-  
12 phosphate.

|                                 | Keys | Metabolite                            | NB1D vs. IB1D |
|---------------------------------|------|---------------------------------------|---------------|
|                                 | 1    | R- <i>CH<sub>3</sub></i>              | -0.98         |
|                                 | 2    | R- <i>CH<sub>2</sub></i>              | -0.99         |
| Lipids                          | 3    | <i>CH<sub>2</sub>CH<sub>2</sub>CO</i> | -0.97         |
|                                 | 4    | <i>CH<sub>2</sub>C=C</i>              | -0.92         |
|                                 | 5    | UFA                                   | -0.97         |
|                                 | 6    | trehalose                             | -0.85         |
|                                 | 7    | glucose                               | -0.88         |
| Glucose &<br>TCA Cycles         | 8    | pyruvate                              | 0.60          |
|                                 | 9    | succinate                             | -0.87         |
|                                 | 10   | citrate                               | -0.77         |
|                                 | 11   | acetate                               | 0.85          |
|                                 | 12   | acetoacetate                          | 0.79          |
| Amino acids                     | 13   | tyrosine                              | 0.69          |
|                                 | 14   | choline                               | 0.74          |
| Cholines                        | 15   | PC                                    | 0.79          |
|                                 | 16   | GPC                                   | -0.96         |
|                                 | 17   | DMA                                   | 0.60          |
| Nucleotides<br>&<br>Nucleosides | 18   | xanthurate                            | 0.74          |
|                                 | 19   | inosine                               | -0.66         |
|                                 | 20   | ADP                                   | -0.88         |
|                                 | 21   | IMP                                   | 0.61          |

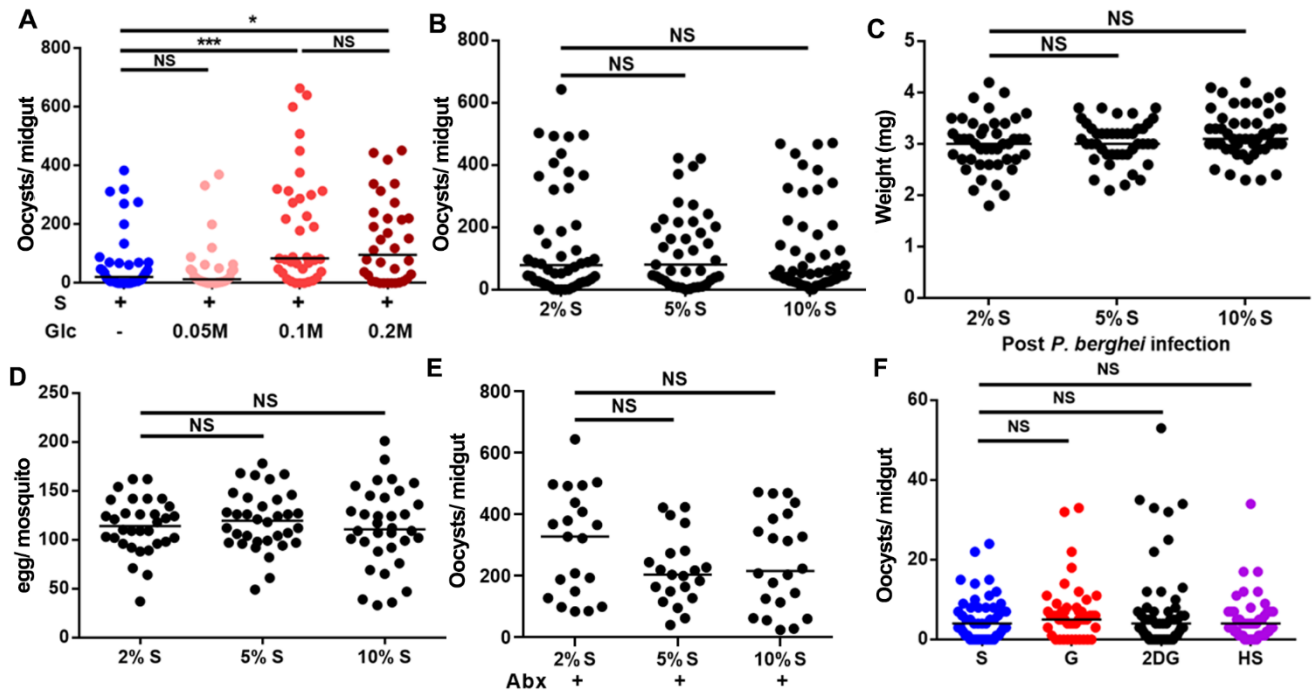

**Figure S2. The influence of sugar treatments on *An. stephensi*, Related to Figure 2.**

(A) *P. berghei* oocyst intensity in mosquitoes fed with 2% sucrose containing 0 M, 0.05 M, 0.1 M and 0.2 M glucose, respectively.

(B) *P. berghei* oocyst intensity in mosquitoes fed with 2%, 5%, and 10% sucrose.

(C) Weight of fully engorged mosquitoes fed with 2%, 5%, and 10% sucrose.

(D) The number of mature eggs in ovaries of mosquitoes fed with 2%, 5%, and 10% sucrose.

(E) *P. berghei* oocyst intensity in antibiotics treated mosquitoes (Abx) fed with 2%, 5%, and 10% sucrose.

(F) *P. berghei* oocyst intensity in mosquitoes fed with S, G, 2-DG and HS diets post blood meal.

Each dot represents an individual mosquito and horizontal lines represent the medians. Results shown in A-F were pooled from at least two independent experiments. Significance in A, B, E and F was determined by ANOVA with Dunn's tests. Significance in C and D was determined by ANOVA with Dunnett tests. NS, not significant, \*,  $p < 0.05$ , and \*\*\*,  $p < 0.001$ . S, 2% sucrose; G, 2% sucrose + 0.1 M glucose; 2-DG, 2% sucrose + 0.1 M glucose + 5 mM 2-DG; HS, 10% sucrose.

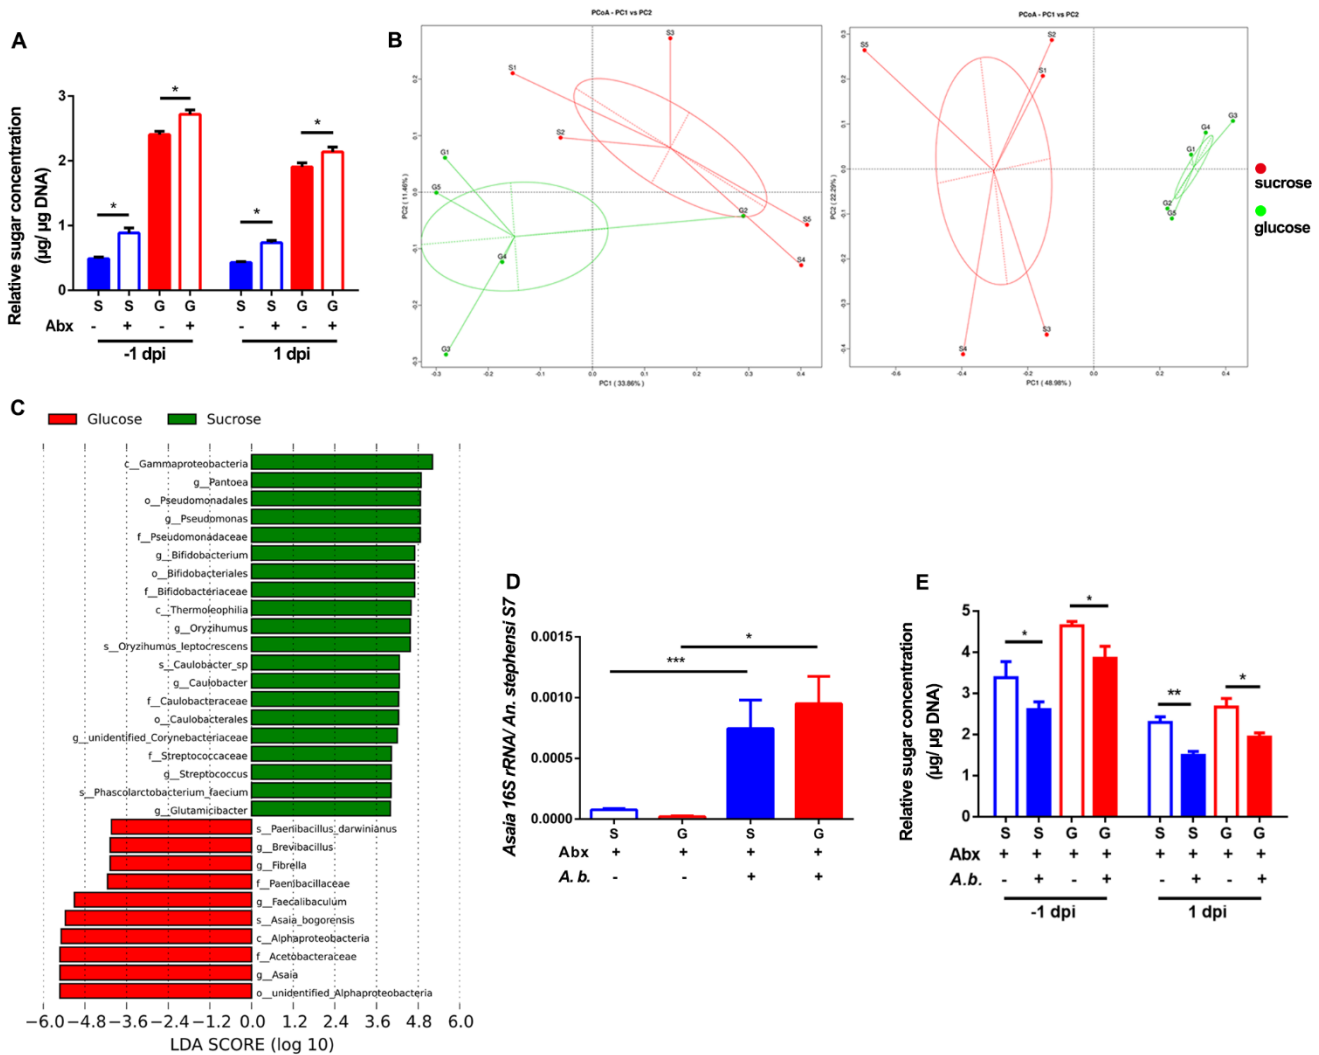

**Figure S3. The influence of *A. bogorensis* on glucose consumption and *P. berghei* infection, Related to Figure 3.**

(A) The relative concentration of total sugar (glucose + trehalose) in the midgut of antibiotics treated mosquitoes fed on different sugar diets 1 day prior to (-1 dpi) and 1 day (1 dpi) post infection, respectively.

(B) Principal Component Analysis (PCA) of bacterial composition by unweighted (left panel) and weighted (right panel) unifracs analyses. Each plot represents 5 midguts as a biological repeat.

(C) LefSe analysis of midgut microbiota fed on S and G diets. LDA scores showed significant bacterial differences within groups at the different levels. Green, mosquitoes fed on 2% sucrose; Red, mosquitoes fed on 2% sucrose + 0.1 M glucose.

40 (D) The abundance of *A. bogorensis* in the midgut of *An. stephensi* determined by qPCR.

41 (E) The relative concentration of total sugar (glucose and trehalose) in the midgut of mosquitoes 1

42 day prior to (-1 dpi) and 1 day (1 dpi) post infection.

43 Glucose and trehalose concentrations in A and E were normalized to genomic DNA extracted from

44 midgut. Significance in A, and E was determined by Student's *t* test, in D was determined by ANOVA

45 with Dunnett tests. Data were shown as mean  $\pm$  SEM (A and E,  $n = 5$ , D,  $n = 10$ ). \*,  $p < 0.05$ , \*\*,  $p$

46  $< 0.01$ , and \*\*\*,  $p < 0.001$ , S, 2% sucrose; G, 2% sucrose + 0.1 M glucose, Abx, antibiotics treatment,

47 *A. b.*, *A. bogorensis* re-colonization.

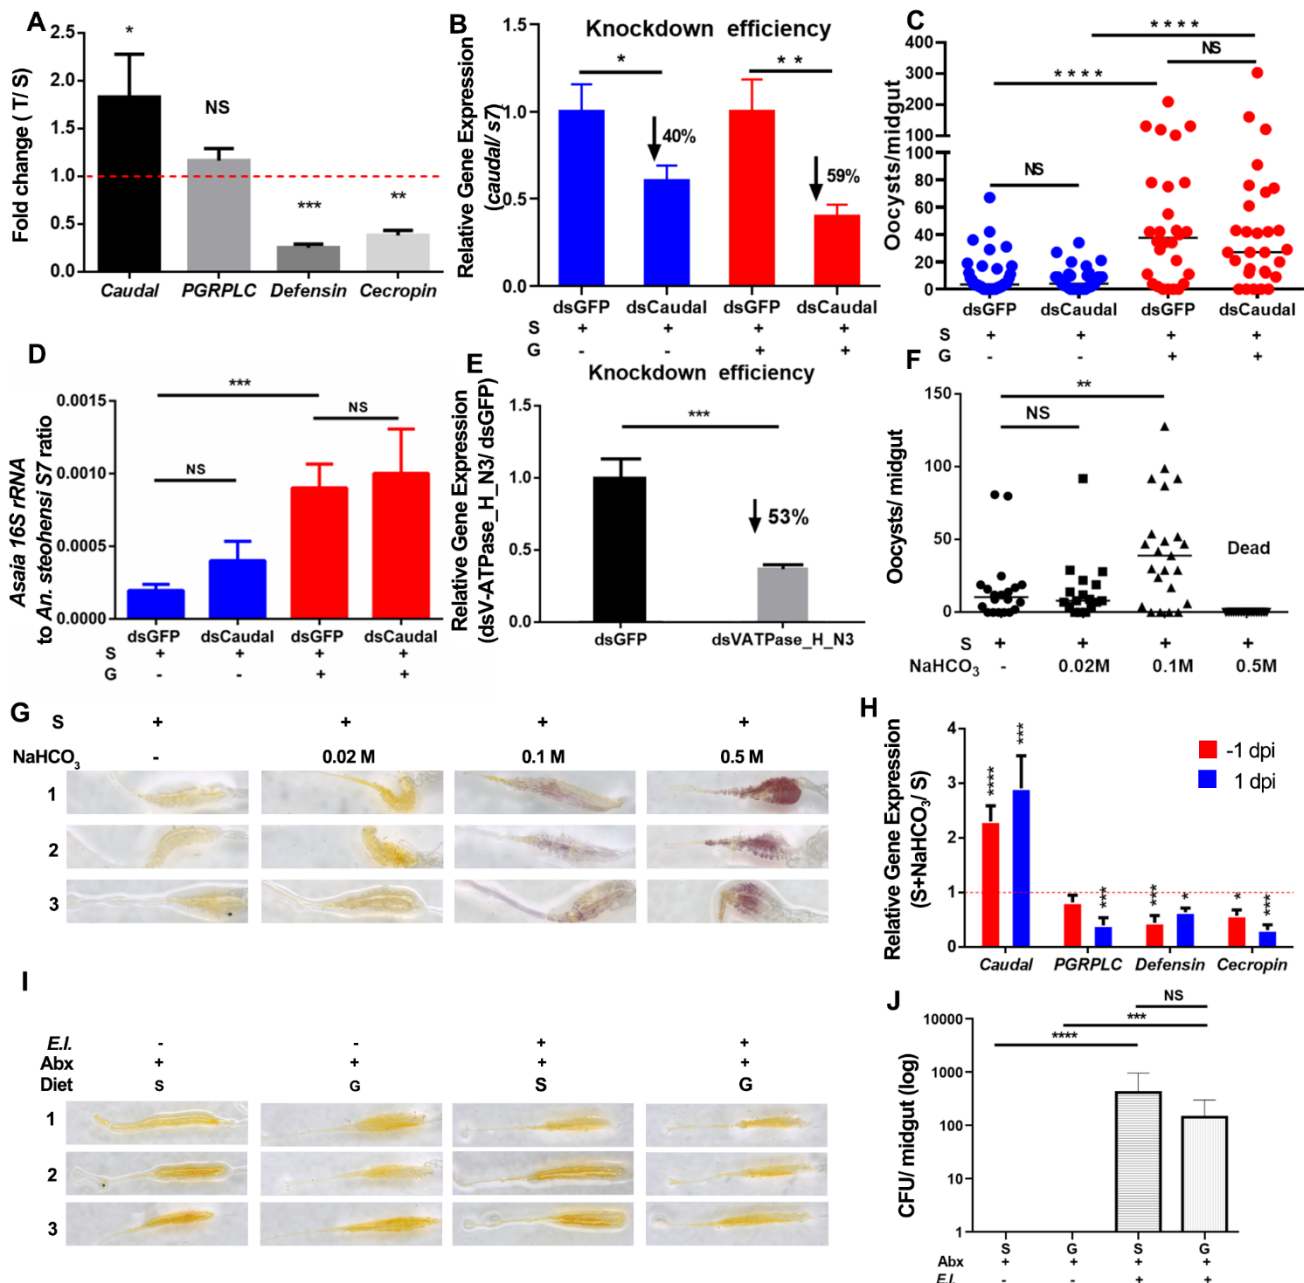

48  
49 **Figure S4. Influence of mosquito midgut pH on *P. berghei* infection, Related to Figures 4 and**

50 **5.**

51 (A) The relative expression levels of *caudal*, *pgrp-lc*, *defensin*, and *cecropin* in mosquitoes fed with  
52 T at -1 dpi. The expression levels of genes in T fed mosquitoes were normalized to the gene's  
53 expression in S fed ones.

54 (B) *Caudal* knocking down efficiency. Relative expression level of *Caudal* was normalized to that in  
55 dsGFP control. Ribosomal gene S7 used as an internal control. Error bars indicate standard error  
56 ( $n = 8$ ). Results from one of two independent experiments are shown.



57 (C) *P. berghei* oocyst intensity in dsRNA treated mosquitoes fed with S and G diets, respectively.

58 (D) The abundance of *A. bogorensis* in the midgut of S and G fed *An. stephensi* treated with dsRNA.

59 (E) *V-ATPase\_H\_N3* knocking down efficiency. Relative expression level of *V-ATPase\_H\_N3* was  
60 normalized to that in dsGFP control. Ribosomal gene *S7* used as an internal control. Error bars  
61 indicate standard error of the mean ( $n = 10$ ). Results from one of three independent experiments are  
62 shown.

63 (F) *P. berghei* oocyst intensity in mosquitoes fed with S and S + 0.02 M, 0.1 M and 0.5 M  $\text{NaHCO}_3$ ,  
64 respectively.

65 (G) The pH staining of mosquito midguts fed with increasing concentration of  $\text{NaHCO}_3$  by m-cresol  
66 purple. Images are the three representatives of at least five individual mosquito midguts.

67 (H) The expression levels of *caudal*, *pgrp-lc*, *defensin*, and *cecropin* in mosquitoes fed with S + 0.1  
68 M  $\text{NaHCO}_3$  diet one day prior to (-1 dpi) and one day (1 dpi) post infection, were normalized to the  
69 gene's expression of the ones fed with S diet.

70 (I) Influence of *Enterobacter* sp. re-colonization on the pH of midguts by m-cresol purple. Images  
71 are three representatives of at least five individual mosquito midguts.

72 (J) The CFU of *Enterobacter* sp. colonized in the midgut of antibiotics treated *An. stephensi*.

73 Each dot in C and F represents an individual mosquito and horizontal lines represent the medians.

74 Significance in A, B, E and H was determined by Student's *t* test. Significance in D and J was  
75 determined by ANOVA with Tukey tests. Error bars indicate standard error of the mean (A, B, E and

76 H,  $n = 8$ ; D and J,  $n = 10$ ). Results shown in C and F were pooled from at least two independent  
77 experiments. Significance was determined by ANOVA with Dunn's tests. NS, not significant, \*,  $p <$

78 0.05, \*\*,  $p < 0.01$ , \*\*\*,  $p < 0.001$ , and \*\*\*\*,  $p < 0.0001$ . T, 2% sucrose + 0.1 M trehalose; S, 2%

79 sucrose; G, 2% sucrose + 0.1 M glucose.

80 **Supplementary Table 3: Significantly changed metabolites in conditioned media from *A.***  
81 ***bogorensis* grown. Related to Figure 5.** S, 2% sucrose; G, 2% sucrose + 0.1 M glucose; T, 2%  
82 sucrose + 0.1 M trehalose. <sup>\*\*\*</sup>, P<0.001.

| Keys | Metabolites    | Fold change<br>(G/S) | Fold change<br>(T/S) |
|------|----------------|----------------------|----------------------|
| 1    | sucrose        | 1.93 <sup>***</sup>  | 0.39 <sup>***</sup>  |
| 2    | glucose        | 0.45 <sup>***</sup>  | 0.7 <sup>***</sup>   |
| 3    | trehalose      | 1.15 <sup>***</sup>  | 86.11 <sup>***</sup> |
| 4    | citrate        | 0.65 <sup>***</sup>  | 0.5 <sup>***</sup>   |
| 5    | succinate      | 0.56 <sup>***</sup>  | 0.65 <sup>***</sup>  |
| 6    | ethanol        | 0.70 <sup>***</sup>  | 0.55 <sup>***</sup>  |
| 7    | valine         | 0.62 <sup>***</sup>  | 0.48 <sup>***</sup>  |
| 8    | isoleucine     | 0.64 <sup>***</sup>  | 0.51 <sup>***</sup>  |
| 9    | leucine        | 0.66 <sup>***</sup>  | 0.49 <sup>***</sup>  |
| 10   | alanine        | 0.58 <sup>***</sup>  | 0.41 <sup>***</sup>  |
| 11   | tyrosine       | 0.70 <sup>***</sup>  | 0.53 <sup>***</sup>  |
| 12   | phenylalanine  | 0.69 <sup>***</sup>  | 0.53 <sup>***</sup>  |
| 13   | trimethylamine | 2.22 <sup>***</sup>  | 0.51 <sup>***</sup>  |
| 14   | dimethylamine  | 0.65 <sup>***</sup>  | 0.51 <sup>***</sup>  |
| 15   | inosine        | 1.13 <sup>***</sup>  | 0.49 <sup>***</sup>  |

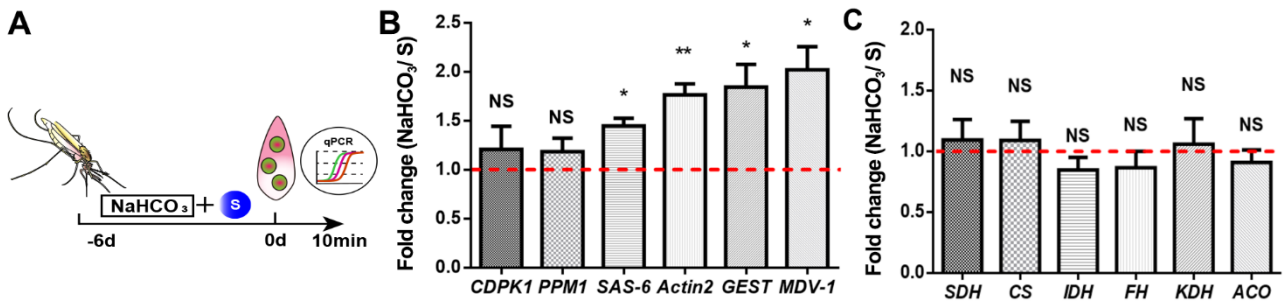

**Figure S5. Addition of NaHCO<sub>3</sub> induces the expression of genes associated with microgamete development, Related to Figure 6.**

(A) Workflow of NaHCO<sub>3</sub> treatment and qPCR assay.

(B) Quantification of expression levels of genes associated with male gametogenesis. The expression level of male gametogenesis related genes in NaHCO<sub>3</sub> (0.1 M) supplemented mosquitoes was normalized to that in mosquitoes fed on S diet.

(C) Quantification of expression levels of genes associated with mitochondrial energy metabolism. *SDH*, succinate dehydrogenase; *CS*, citrate synthase; *IDH*, isocitrate dehydrogenase; *FH*, fumarate hydratase; *KDH*, alpha-Ketoglutarate dehydrogenase; *ACO*, acyl-CoA oxidase. The expression level of target genes in NaHCO<sub>3</sub> (0.1 M) supplemented mosquitoes was normalized to that in mosquitoes fed on S diet.

Significance in B and C was determined by Student's *t* test. Error bars indicate standard error of the mean ( $n = 8$ ). NS, not significant, \*,  $p < 0.05$ , and \*\*,  $p < 0.01$ . S, 2% sucrose.

**Supplementary Table 4: qRT-PCR primers used in this study. Related to Figure 3, Figure 6, Figure 7, Figure S2, Figure S3, Figure S4 and Figure S5.**

| Gene                | Forward primer                     | Reverse primer                | Reference               |
|---------------------|------------------------------------|-------------------------------|-------------------------|
| <i>VATPase_H_N3</i> | TGGCATCAGCACGCTCATCA<br>G          | TCCTTCGCACAGTCGCTCAGA         | This paper              |
| <i>Caudal</i>       | CAAGGACCGCAAGCAGAA<br>GAA          | CGATTGACCGCCGAGACC            | This paper              |
| <i>Ab16S rRNA</i>   | GATGACATGAACCGTGCCCT<br>GG         | ACCTCCGTCTTGATGGCGTACA        | (Favia et al., 2007)    |
| <i>AsteS7</i>       | TGCGGAGCGTCGTATTCTGC               | ACACAGCGGTGAGCGTTCG           | (Salazar et al., 1993)  |
| <i>PbCDPK1</i>      | TGGTGGGCAAACGATCAAG<br>A           | GCTTCCTCAGCCGTACATCT          | This paper              |
| <i>PbPPM1</i>       | AGGGGATAGTCGCTGTGTCT<br>T          | ACCTCGGCATACTCCTAAGCAT        | This paper              |
| <i>PbAcint2</i>     | TTCTTGATAGTGGTGATGGC<br>GTAA       | CGATTTCTCTTTCAGCGGTTGT<br>AG  | This paper              |
| <i>PbGEST</i>       | CTACATTGAGAGCCATGATA<br>CTT        | AAACTGTGTCACCAATTTCAAG<br>AT  | This paper              |
| <i>PbMDV-1</i>      | TCCAACATCAACCATAGGGT<br>GTCT       | TGCCTTGCCTCCACTTCCA           | This paper              |
| <i>PbSAS-6</i>      | AAAGGATATGGGCGTGATGG<br>AT         | ACACTCATTAGATGTACCACCA<br>CT  | This paper              |
| <i>Pb18S</i>        | AAGCATTAAATAAAGCGAATA<br>CATCCTTAC | GGAGATTGGTTTTGACGTTTAT<br>GTG | (Baptista et al., 2010) |
| <i>PbACO</i>        | TGGCACCAGAATATGGAGCT<br>ACAA       | TCTCGTCATCTCGTCCTGTTTG<br>TT  | This paper              |
| <i>PbKDH</i>        | ATGAACATCCAGACGCACTA<br>G          | AGGTAACAACATAACAACCTCCA<br>GA | This paper              |
| <i>PbIDH</i>        | GAGGGTTTGTGGGCGTGT<br>AAA          | GGCTTCATATCCTTGTGCAAC<br>TG   | This paper              |
| <i>PbCS</i>         | TTCACGAGAGCTATATTGCCG<br>AG        | TAGGGTGTGTAATGGTGGTAT<br>GC   | This paper              |
| <i>PbSDH</i>        | TCGCTGGATAGTTGATACAAG<br>AGA       | GCACACTGAGCAATTCATTATT<br>CC  | This paper              |
| <i>PbFH</i>         | GCCAACAACCTGCTGGAAGA               | GCCAAAGAAATTAAGACGCAT<br>TG   | This paper              |
| <i>AsteCec</i>      | GCTGCTCTTTCTCGTTGCG                | CGGCACCTTCCACCTTCT            | This paper              |
| <i>AsteDef</i>      | CCGCCTTGAACACGCTCCT                | GCTGCCGACACCGAATCCA           | This paper              |
| <i>AsteLC</i>       | TGTGCCATCGTAGCGGTCAT               | AGCCACTCGGTTCTCGTCAC          | This paper              |
